# Supplementary material for: Effects of vertebral number variations on carcass traits and genotyping of Vertnin candidate gene in Kazakh sheep
Source: PubMed Central journal article supplement — Asian-Australas J Anim Sci. 2017 Mar 25;30(9):1234–8. doi: 10.5713/ajas.16.0959 (PMC5582278; doi:10.5713/ajas.16.0959), 2017-03-25
Supplement: ajas-30-9-1234-supplementary.pdf [file ajas-30-9-1234-supplementary.pdf]

**Table S1** The effect of thoracic vertebral number on carcass length and carcass weight

| TVN | No. | CL(cm)                    | CW(kg)                    |
|-----|-----|---------------------------|---------------------------|
| 12  | 17  | 70.836±1.300 <sup>A</sup> | 24.129±1.589 <sup>a</sup> |
| 13  | 571 | 72.105±0.724 <sup>A</sup> | 24.174±0.884 <sup>a</sup> |
| 14  | 36  | 74.212±0.989 <sup>B</sup> | 24.627±1.209 <sup>a</sup> |

TVN, thoracic vertebral number; CL, carcass length; CW, carcass weight; Phenotypic values are shown in estimated marginal means ± standard error. Values with different superscript capital letters in the same column are highly significantly different ( $p \leq 0.01$ ). Values with same superscript lowercase letters in the same column are not significantly different ( $p > 0.05$ )

**Table S2** The effect of lumbar vertebral number on carcass length and carcass weight

| LVN | No. | CL(cm)                    | CW(kg)                    |
|-----|-----|---------------------------|---------------------------|
| 5   | 77  | 71.237±0.863 <sup>a</sup> | 23.706±1.051 <sup>a</sup> |
| 6   | 547 | 72.507±0.720 <sup>b</sup> | 24.309±0.877 <sup>a</sup> |

LVN, lumbar vertebral number; CL, carcass length; CW, carcass weight; Phenotypic values are shown in estimated marginal means ± standard error. Values with different superscript lowercase letters in the same column are significantly different ( $p \leq 0.05$ ). Values with same superscript lowercase letters in the same column are not significantly different ( $p > 0.05$ )

**Table S3** The effect of vertebral formulae on carcass weight and carcass length

| VF    | No. | CL(cm)                     | CW(kg)                    |
|-------|-----|----------------------------|---------------------------|
| T12L6 | 17  | 70.848±1.296 <sup>ab</sup> | 24.135±1.589 <sup>a</sup> |
| T13L5 | 77  | 71.108±0.860 <sup>bA</sup> | 23.682±1.054 <sup>a</sup> |
| T13L6 | 494 | 72.284±0.727 <sup>ac</sup> | 24.262±0.891 <sup>a</sup> |
| T14L6 | 36  | 74.209±0.987 <sup>dB</sup> | 24.626±1.209 <sup>a</sup> |

VF, vertebral formulae; T12L6, 12 thoracic and 6 lumbar vertebrae; T13L5, 13 thoracic and 5 lumbar vertebrae; T13L6, 13 thoracic and 6 lumbar vertebrae; T14L6, 14 thoracic and 6 lumbar vertebrae. CL, carcass length; CW, carcass weight; Phenotypic values are shown in estimated marginal means ± standard error. Values with different superscript lowercase letters in the same column are significantly different ( $p \leq 0.05$ ), and Values with different superscript capital letters in the same column are highly significantly different ( $p \leq 0.01$ ).

**Table S4** The mutations in VRTN gene

| SNP Identifier | SNP ID(dbSNP)       | Chr:bp**   | Alleles | Function   |
|----------------|---------------------|------------|---------|------------|
| SNP256         | rs602874467         | 7:82533570 | G/T     | synonymous |
| SNP347         | rs413788795         | 7:82533661 | C/T     | synonymous |
| SNP394         | rs599909970         | 7:82533708 | G/T     | synonymous |
| SNP415         | rs423107755         | 7:82533729 | A/G     | synonymous |
| SNP898         | rs602768677         | 7:82533904 | A/C     | missense   |
| SNP1029        | rs596082307         | 7:82534035 | C/T     | synonymous |
| SNP1259        | <b>rs426367238*</b> | 7:82534266 | C/G     | synonymous |
| SNP1377        | rs429465892         | 7:82534383 | C/T     | synonymous |
| SNP1708        | rs428776549         | 7:82534714 | C/T     | missense   |

\* The SNP that affected the thoracic vertebral number significantly was shown in bold.

\*\* The position was annotated based on the reference sheep genome Oar\_v4.0.
